# Supplementary material for: Optimized arrangement of non-π-conjugated PO3NH3 units leads to enhanced ultraviolet optical nonlinearity in NaPO3NH3
Source: Royal Society of Chemistry journal article supplement (doi:10.1039/d3qi02465b), 2024-01-01
Supplement: d3qi02465b1.pdf [file d3qi02465b1.pdf]

## Electronic Supplementary Information (ESI)

# Optimized Arrangement of Non- $\pi$ -Conjugated $\text{PO}_3\text{NH}_3$ Units Leads to Enhanced Ultraviolet Optical Nonlinearity in $\text{NaPO}_3\text{NH}_3$

Lingli Wu,<sup>a, b, c</sup> Haotian Tian,<sup>b, c</sup> Chensheng Lin,<sup>b</sup> Xin Zhao,<sup>b, c</sup> Huixin Fan,<sup>b</sup> Pengxiang Dong,<sup>b</sup>

Shunda Yang,<sup>b</sup> Ning Ye,<sup>d</sup> and Min Luo\*<sup>a, b</sup>

a Fujian Science & Technology Innovation Laboratory for Optoelectronic Information of China, Fuzhou, Fujian, 350108, China. E-mail: [lm8901@fjirsm.ac.cn](mailto:lm8901@fjirsm.ac.cn)

b Key Laboratory of Optoelectronic Materials Chemistry and Physics, Fujian Institute of Research on the Structure of Matter, Chinese Academy of Sciences, Fuzhou, Fujian, 350002, China.

c University of the Chinese Academy of Sciences, Beijing, 100049, China.

d Tianjin Key Laboratory of Functional Crystal Materials, Institute of Functional Crystal, Tianjin University of Technology, Tianjin, 300384, China.

## Contents

|                                                                                                                                                |    |
|------------------------------------------------------------------------------------------------------------------------------------------------|----|
| Table S1. Crystal Data and Structure Refinement of NaPO <sub>3</sub> NH <sub>3</sub> . .....                                                   | 3  |
| Table S2. Atomic coordinates, equivalent isotropic displacement parameters.....                                                                | 4  |
| Table S3. Hydrogen coordinates and isotropic displacement parameters. ....                                                                     | 4  |
| Table S4. Selected Bond lengths (Å) and bond angles (°) for NaPO <sub>3</sub> NH <sub>3</sub> . ....                                           | 5  |
| Table S5. Anisotropic displacement parameters (Å <sup>2</sup> ×10 <sup>3</sup> ) for NaPO <sub>3</sub> NH <sub>3</sub> . ....                  | 6  |
| Table S6. Direction and magnitude of dipole moments of [PO <sub>3</sub> N] tetrahedron [PO <sub>3</sub> F] <sup>2-</sup> in the unit cell..... | 6  |
| Table S7. The NLO properties of phosphates whose λ <sub>cut-off</sub> below 200 nm.....                                                        | 7  |
| Figure S1. Calculated and experimental powder X-ray diffraction patterns..                                                                     | 9  |
| Figure S2. Energy dispersive X-ray spectroscopy analysis of NaPO <sub>3</sub> NH <sub>3</sub> . ....                                           | 9  |
| Figure S3. TG-DTA curves of NaPO <sub>3</sub> NH <sub>3</sub> . ....                                                                           | 10 |
| Figure S4. (a) Na-O chain; (b) [PO <sub>3</sub> NH <sub>3</sub> ] <sup>-</sup> group .....                                                     | 10 |
| Figure S5. The calculated band structure of NaPO <sub>3</sub> NH <sub>3</sub> . ....                                                           | 11 |
| Figure S6. Calculated SHG coefficients of NaPO <sub>3</sub> NH <sub>3</sub> . ....                                                             | 11 |
| Figure S7. Single crystal of NPNH under the polarizing microscope..                                                                            | 12 |
| References .....                                                                                                                               | 12 |

**Table S1.** Crystal Data and Structure Refinement of NaPO<sub>3</sub>NH<sub>3</sub>.

| Formula                                                              | NaPO <sub>3</sub> NH <sub>3</sub> |
|----------------------------------------------------------------------|-----------------------------------|
| Formula weight                                                       | 79.33                             |
| Temperature (K)                                                      | 293(2)                            |
| Wavelength (Å)                                                       | 1.54184                           |
| Crystal system                                                       | Hexagonal                         |
| space group                                                          | P6(3)                             |
| a (Å)                                                                | 5.78050(10)                       |
| b (Å)                                                                | 5.78050(10)                       |
| c (Å)                                                                | 6.02650(10)                       |
| α (deg.)                                                             | 90                                |
| β (deg.)                                                             | 90                                |
| γ (deg.)                                                             | 120                               |
| V (Å <sup>3</sup> )                                                  | 174.392(7)                        |
| Z                                                                    | 3                                 |
| Calculated density (mg/m <sup>3</sup> )                              | 2.266                             |
| Absorption coefficient (mm <sup>-1</sup> )                           | 7.004                             |
| F(000)                                                               | 120                               |
| Theta range (deg.)                                                   | 8.859 to 76.177                   |
| Limiting indices                                                     | -7<=h<=7<br>-7<=k<=7<br>-7<=l<=7  |
| Reflections collected / unique                                       | 3022 / 253                        |
| R(int)                                                               | 0.0256                            |
| Completeness to θ = 67.684 (%)                                       | 100.0                             |
| Goodness-of-fit on F <sup>2</sup>                                    | 1.166                             |
| R <sub>w</sub> R (I>2σ(I))                                           | R1 = 0.0244<br>wR2 = 0.0684       |
| R <sub>w</sub> R (all data)                                          | R1 = 0.0245<br>wR2 = 0.0684       |
| Absolute structure parameter                                         | 0.07(8)                           |
| $^a R_1 = \sum   F_o  -  F_c   / \sum  F_o $                         |                                   |
| $^b wR_2(F_o^2) = [\sum w(F_o^2 - F_c^2)^2 / \sum w(F_o^2)^2]^{1/2}$ |                                   |

**Table S2.** Atomic coordinates ( $\times 10^4$ ), equivalent isotropic displacement parameters ( $\text{\AA}^2 \times 10^3$ ) for  $\text{NaPO}_3\text{NH}_3$ .

| Atom   | x       | y       | z        | U(eq) |
|--------|---------|---------|----------|-------|
| P(001) | 6667    | 3333    | 3811(3)  | 13(1) |
| Na(02) | 10000   | 10000   | 5713(3)  | 20(1) |
| O(003) | 7737(4) | 6233(4) | 3230(4)  | 18(1) |
| N(004) | 6667    | 3333    | 6762(10) | 15(1) |

**Table S3.** Hydrogen coordinates ( $\times 10^4$ ) and isotropic displacement parameters ( $\text{\AA}^2 \times 10^3$ ) for  $\text{NaPO}_3\text{NH}_3$ .

| Atom   | x    | y    | z    | U(eq) |
|--------|------|------|------|-------|
| H(00C) | 5295 | 3482 | 7254 | 18    |
| H(00B) | 8187 | 4705 | 7254 | 18    |
| H(00A) | 6518 | 1813 | 7254 | 18    |

**Table S4.** Selected Bond lengths (Å) and bond angles (°) for NaPO<sub>3</sub>NH<sub>3</sub>.

|                          |            |                          |            |
|--------------------------|------------|--------------------------|------------|
| P(001)-O(003)#1          | 1.510(2)   | O(003)#4-Na(02)-O(003)#6 | 94.57(5)   |
| P(001)-O(003)#2          | 1.509(2)   | O(003)#5-Na(02)-O(003)#6 | 85.15(10)  |
| P(001)-O(003)            | 1.509(2)   | O(003)#3-Na(02)-O(003)#7 | 94.57(5)   |
| P(001)-N(004)            | 1.779(6)   | O(003)-Na(02)-O(003)#7   | 94.57(5)   |
| Na(02)-O(003)#3          | 2.417(3)   | O(003)#4-Na(02)-O(003)#7 | 179.62(11) |
| Na(02)-O(003)            | 2.417(3)   | O(003)#5-Na(02)-O(003)#7 | 85.15(10)  |
| Na(02)-O(003)#4          | 2.417(3)   | O(003)#6-Na(02)-O(003)#7 | 85.15(10)  |
| Na(02)-O(003)#5          | 2.430(2)   | O(003)#3-Na(02)-Na(02)#8 | 51.75(6)   |
| Na(02)-O(003)#6          | 2.430(2)   | O(003)-Na(02)-Na(02)#8   | 51.75(6)   |
| Na(02)-O(003)#7          | 2.430(2)   | O(003)#4-Na(02)-Na(02)#8 | 51.75(6)   |
| Na(02)-Na(02)#8          | 3.01324(5) | O(003)#5-Na(02)-Na(02)#8 | 128.63(7)  |
| Na(02)-Na(02)#6          | 3.01326(5) | O(003)#6-Na(02)-Na(02)#8 | 128.63(7)  |
| N(004)-H(00C)            | 0.8900     | O(003)#7-Na(02)-Na(02)#8 | 128.63(7)  |
| N(004)-H(00B)            | 0.8900     | O(003)#3-Na(02)-Na(02)#6 | 128.25(6)  |
| N(004)-H(00A)            | 0.8900     | O(003)-Na(02)-Na(02)#6   | 128.25(6)  |
| O(003)#1-P(001)-O(003)#2 | 114.79(8)  | O(003)#4-Na(02)-Na(02)#6 | 128.25(6)  |
| O(003)#1-P(001)-O(003)   | 114.79(8)  | O(003)#5-Na(02)-Na(02)#6 | 51.37(7)   |
| O(003)#2-P(001)-O(003)   | 114.79(8)  | O(003)#6-Na(02)-Na(02)#6 | 51.37(7)   |
| O(003)#1-P(001)-N(004)   | 103.41(11) | O(003)#7-Na(02)-Na(02)#6 | 51.37(7)   |
| O(003)#2-P(001)-N(004)   | 103.41(11) | Na(02)#8-Na(02)-Na(02)#6 | 180.0      |
| O(003)-P(001)-N(004)     | 103.41(11) | P(001)-O(003)-Na(02)     | 126.40(15) |
| O(003)#3-Na(02)-O(003)   | 85.71(9)   | P(001)-O(003)-Na(02)#8   | 151.40(15) |
| O(003)#3-Na(02)-O(003)#4 | 85.71(9)   | Na(02)-O(003)-Na(02)#8   | 76.87(6)   |
| O(003)-Na(02)-O(003)#4   | 85.71(9)   | P(001)-N(004)-H(00C)     | 109.5      |
| O(003)#3-Na(02)-O(003)#5 | 179.62(11) | P(001)-N(004)-H(00B)     | 109.5      |
| O(003)-Na(02)-O(003)#5   | 94.57(5)   | H(00C)-N(004)-H(00B)     | 109.5      |
| O(003)#4-Na(02)-O(003)#5 | 94.57(5)   | P(001)-N(004)-H(00A)     | 109.5      |
| O(003)#3-Na(02)-O(003)#6 | 94.57(5)   | H(00C)-N(004)-H(00A)     | 109.5      |
| O(003)-Na(02)-O(003)#6   | 179.62(11) | H(00B)-N(004)-H(00A)     | 109.5      |

Symmetry transformations used to generate equivalent atoms:

#1 -x+y+1,-x+1,z #2 -y+1,x-y,z #3 -x+y+1,-x+2,z #4 -y+2,x-y+1,z

#5 x-y+1,x,z+1/2 #6 -x+2,-y+2,z+1/2 #7 y,-x+y+1,z+1/2 #8 -x+2,-y+2,z-1/2

**Table S5.** Anisotropic displacement parameters ( $\text{\AA}^2 \times 10^3$ ) for  $\text{NaPO}_3\text{NH}_3$ .The anisotropic displacement factor exponent takes the form:  $-2\pi^2 [h^2a^*2U_{11}+2hka^*b^*U_{12}+\dots]$ .

| Atom   | $U_{11}$ | $U_{22}$ | $U_{33}$ | $U_{23}$ | $U_{13}$ | $U_{12}$ |
|--------|----------|----------|----------|----------|----------|----------|
| P(001) | 13(1)    | 13(1)    | 14(1)    | 0        | 0        | 6(1)     |
| Na(02) | 21(1)    | 21(1)    | 19(2)    | 0        | 0        | 11(1)    |
| O(003) | 18(1)    | 15(1)    | 20(1)    | 2(1)     | -1(1)    | 8(1)     |
| N(004) | 15(1)    | 15(1)    | 15(2)    | 0        | 0        | 7(1)     |

**Table S6.** Direction and magnitude of dipole moments of  $[\text{PO}_3\text{N}]$  tetrahedron groups for NPNH and  $[\text{PO}_3\text{F}]^{2-}$  in the unit cell.

| Compound                                                    | Species                        | Dipole moment (D) |         |         |                    |
|-------------------------------------------------------------|--------------------------------|-------------------|---------|---------|--------------------|
|                                                             |                                | $\mu_x$           | $\mu_y$ | $\mu_z$ | $M_{\text{total}}$ |
| NPNH                                                        | $\text{PO}_3\text{N}$          | 0                 | 0       | 5.01    | 5.01               |
|                                                             | $\text{P}'\text{O}_3\text{N}$  | 0                 | 0       | 5.01    | 5.01               |
|                                                             | $\Sigma$ in unit cell          | 0                 | 0       | 10.02   | 10.02              |
| $\text{NaNH}_4\text{PO}_3\text{F} \cdot \text{H}_2\text{O}$ | $\text{PO}_3\text{F}$          | -0.03             | 1.45    | -6.37   | 6.53               |
|                                                             | $\text{P}'\text{O}_3\text{F}$  | -0.03             | -1.45   | -6.37   | 6.53               |
|                                                             | $\text{P}''\text{O}_3\text{F}$ | -0.02             | -1.45   | -6.37   | 6.53               |
|                                                             | $\Sigma$ in unit cell          | -0.08             | -4.35   | -19.11  | 19.59              |

**Table S7.** The NLO properties of phosphates whose  $\lambda_{\text{cut-off}}$  below 200 nm.

| FBU's                                                    | Crystal                                                                       | Space group                                     | SHG     | Birefringence               | Absorption edge (nm) | Ref. |
|----------------------------------------------------------|-------------------------------------------------------------------------------|-------------------------------------------------|---------|-----------------------------|----------------------|------|
| (PO <sub>3</sub> ) <sub>∞</sub> chain                    | RbBa <sub>2</sub> (PO <sub>3</sub> ) <sub>5</sub>                             | <i>Pc</i>                                       | 1.4 KDP | 0.009@1064 nm <sup>b</sup>  | 163                  | 1    |
|                                                          | KBa <sub>2</sub> (PO <sub>3</sub> ) <sub>5</sub>                              | <i>Pc</i>                                       | 0.9 KDP | n/a                         | 167                  | 2    |
|                                                          | KPb <sub>2</sub> (PO <sub>3</sub> ) <sub>5</sub>                              | <i>Pn</i>                                       | 0.5 KDP | 0.030@589.3 nm <sup>a</sup> | 177                  | 3    |
|                                                          | KLa(PO <sub>3</sub> ) <sub>4</sub>                                            | <i>P2<sub>1</sub></i>                           | 0.7 KDP | 0.0084@1064 nm <sup>b</sup> | 162                  | 4    |
|                                                          | CsLa(PO <sub>3</sub> ) <sub>4</sub>                                           | <i>P2<sub>1</sub></i>                           | 0.5 KDP | 0.0068@1064 nm <sup>b</sup> | 167                  | 5    |
|                                                          | Cs <sub>6</sub> Mg <sub>6</sub> (PO <sub>3</sub> ) <sub>18</sub>              | <i>P2<sub>1</sub></i>                           | 0.1 KDP | n/a                         | <190                 | 6    |
|                                                          | RbPb <sub>2</sub> (PO <sub>3</sub> ) <sub>5</sub>                             | <i>Pn</i>                                       | 0.3 KDP | n/a                         | 163                  | 3    |
| [P <sub>4</sub> O <sub>12</sub> ] <sup>4-</sup> 8-M ring | K <sub>2</sub> SrP <sub>4</sub> O <sub>12</sub>                               | <i>I-4</i>                                      | 0.5 KDP | 0.016@1064 nm <sup>b</sup>  | <200                 | 7    |
| [P <sub>3</sub> O <sub>9</sub> ] <sup>3-</sup> 6-M ring  | BaNaP <sub>3</sub> O <sub>9</sub>                                             | <i>P2<sub>1</sub>2<sub>1</sub>2<sub>1</sub></i> | 0.3 KDP | n/a                         | 177                  | 8    |
| (P <sub>2</sub> O <sub>7</sub> ) <sup>4-</sup> dimer     | CsNaMgP <sub>2</sub> O <sub>7</sub>                                           | <i>Cmc2<sub>1</sub></i>                         | 1.1 KDP | n/a                         | 180                  | 9    |
|                                                          | RbNaMgP <sub>2</sub> O <sub>7</sub> (HTP)                                     | <i>Ccm2<sub>1</sub></i>                         | 1.4 KDP | 0.035@532nm <sup>a</sup>    | 185                  | 10   |
|                                                          | RbNaMgP <sub>2</sub> O <sub>7</sub> (LTP)                                     | <i>Pna2<sub>1</sub></i>                         | 0.9 KDP | 0.031@532nm <sup>a</sup>    | 185                  | 10   |
|                                                          | Ba <sub>2</sub> NaClP <sub>2</sub> O <sub>7</sub>                             | <i>P4bm</i>                                     | 0.9 KDP | 0.017@1064nm <sup>b</sup>   | <176                 | 11   |
|                                                          | CsLiCdP <sub>2</sub> O <sub>7</sub>                                           | <i>Pmc2<sub>1</sub></i>                         | 1.5 KDP | n/a                         | <200                 | 12   |
|                                                          | Rb <sub>2</sub> Ba <sub>3</sub> (P <sub>2</sub> O <sub>7</sub> ) <sub>2</sub> | <i>P2<sub>1</sub>2<sub>1</sub>2<sub>1</sub></i> | 0.3 KDP | n/a                         | <200                 | 1    |
|                                                          | Cs <sub>2</sub> Ba <sub>3</sub> (P <sub>2</sub> O <sub>7</sub> ) <sub>2</sub> | <i>P2<sub>1</sub>2<sub>1</sub>2<sub>1</sub></i> | 0.4 KDP | n/a                         | <176                 | 13   |
|                                                          | K <sub>4</sub> Mg <sub>4</sub> (P <sub>2</sub> O <sub>7</sub> ) <sub>3</sub>  | <i>Pc</i>                                       | 1.3 KDP | 0.0108@1064nm <sup>a</sup>  | 170                  | 14   |
|                                                          | Rb <sub>4</sub> Mg <sub>4</sub> (P <sub>2</sub> O <sub>7</sub> ) <sub>3</sub> | <i>Amm2</i>                                     | 1.4KDP  | 0.009@1064nm <sup>b</sup>   | <200                 | 14   |

|                                                        |                                                                                                  |                                                                    |                        |                                                                      |                            |      |
|--------------------------------------------------------|--------------------------------------------------------------------------------------------------|--------------------------------------------------------------------|------------------------|----------------------------------------------------------------------|----------------------------|------|
| (P <sub>3</sub> O <sub>10</sub> ) <sup>5-</sup> trimer | Ba <sub>3</sub> P <sub>3</sub> O <sub>10</sub> Cl                                                | <i>Pca2</i> <sub>1</sub>                                           | 0.6KDP                 | 0.028@1064nm <sup>b</sup><br>0.030@532nm <sup>b</sup>                | 180                        | 15   |
|                                                        | Ba <sub>3</sub> P <sub>3</sub> O <sub>10</sub> Br                                                | <i>P2</i> <sub>1</sub> <i>2</i> <sub>1</sub> <i>2</i> <sub>1</sub> | 0.5 KDP                | 0.023@1064nm <sup>b</sup><br>0.024@532nm <sup>b</sup>                | <200                       | 15   |
|                                                        | Ba <sub>5</sub> P <sub>6</sub> O <sub>20</sub>                                                   | <i>Pca2</i> <sub>1</sub>                                           | 0.8 KDP                | n/a                                                                  | 167                        | 16   |
| Isolated (PO <sub>4</sub> ) <sup>3-</sup>              | LiCs <sub>2</sub> PO <sub>4</sub>                                                                | <i>Cmc2</i> <sub>1</sub>                                           | 2.6 KDP                | 0.01@1064nm <sup>b</sup>                                             | <174                       | 17   |
|                                                        | LiRb <sub>2</sub> PO <sub>4</sub>                                                                | <i>Cmc2</i> <sub>1</sub>                                           | 2.1 KDP                | n/a                                                                  | <170                       | 18   |
|                                                        | KMg(H <sub>2</sub> O)PO <sub>4</sub>                                                             | <i>Pmn2</i> <sub>1</sub>                                           | 1.14 KDP               | 0.017@1064nm <sup>b</sup><br>0.018@532nm <sup>b</sup>                | <200                       | 19   |
|                                                        | BPO <sub>4</sub>                                                                                 | <i>I-4</i>                                                         | 2 KDP                  | 0.00555@589nm <sup>a</sup>                                           | 134                        | 20   |
| (PO <sub>3</sub> F) <sup>2-</sup>                      | (NH <sub>4</sub> ) <sub>2</sub> PO <sub>3</sub> F                                                | <i>Pna2</i> <sub>1</sub>                                           | 1 KDP                  | <a href="#">0.030@589.3nm<sup>a</sup></a>                            | <185                       | 21   |
|                                                        | NaNH <sub>4</sub> PO <sub>3</sub> F·H <sub>2</sub> O                                             | <i>Pc</i>                                                          | 1.1 KDP                | 0.053@589.3nm <sup>a</sup>                                           | <200                       | 22   |
|                                                        | [C(NH <sub>2</sub> ) <sub>3</sub> ] <sub>2</sub> PO <sub>3</sub> F                               | <i>Cm</i>                                                          | 1.0 KDP                | 0.039@532nm <sup>b</sup>                                             | <200                       | 23   |
|                                                        | K <sub>3</sub> Sc <sub>3</sub> (PO <sub>4</sub> )(PO <sub>3</sub> F) <sub>2</sub> F <sub>5</sub> | <i>Cc</i>                                                          | 0.9 KDP                | <a href="#">0.026@546nm<sup>a</sup></a><br>0.024@1064nm <sup>a</sup> | <200                       | 24   |
|                                                        | Cd(NH <sub>4</sub> ) <sub>2</sub> (PO <sub>3</sub> F) <sub>2</sub> ·2H <sub>2</sub> O            | <i>Cmc2</i> <sub>1</sub>                                           | 0.78 KDP               | <a href="#">0.026@546nm<sup>a</sup></a>                              | <200                       | 25   |
|                                                        | K <sub>x</sub> (NH <sub>4</sub> ) <sub>2-x</sub> PO <sub>3</sub> F(x=0-0.3)                      | <i>Pna2</i> <sub>1</sub>                                           | 1.0 KDP                | 0.03@532nm <sup>b</sup>                                              | <200                       | 26   |
|                                                        | Na <sub>1.5</sub> Rb <sub>0.5</sub> PO <sub>3</sub> F·H <sub>2</sub> O                           | <i>Pmn2</i> <sub>1</sub>                                           | 0.55 KDP               | 0.04@546nm <sup>a</sup>                                              | <200                       | 27   |
|                                                        | (PO <sub>3</sub> NH <sub>3</sub> ) <sup>-</sup>                                                  | NaPO <sub>3</sub> NH <sub>3</sub>                                  | <i>P6</i> <sub>3</sub> | 0.80KDP                                                              | 0.062@546.1nm <sup>b</sup> | <190 |

a for experiment, b for calculation, and n/a means not reported or not available.



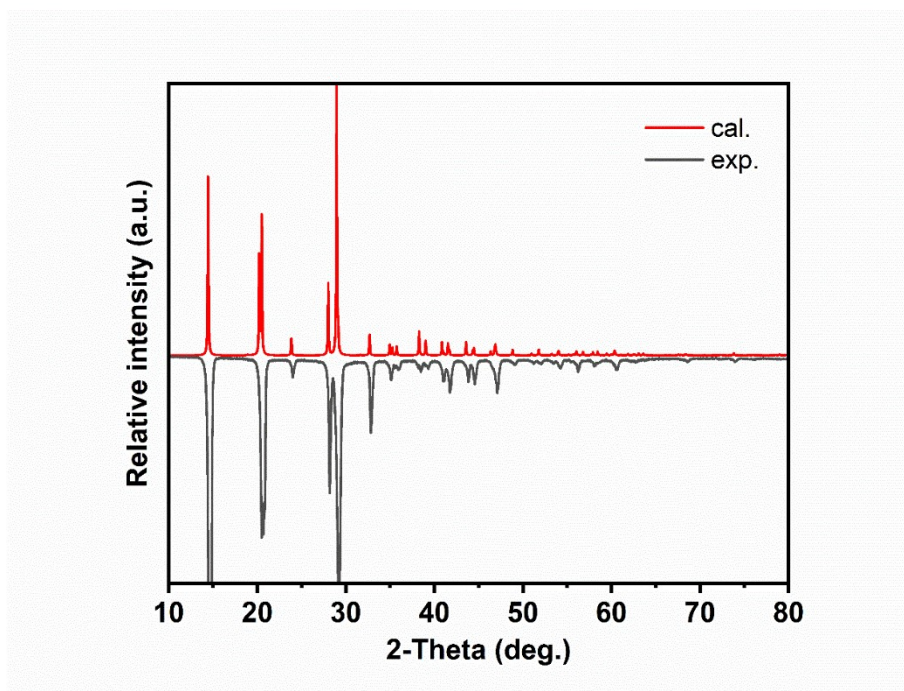

**Figure S1.** Calculated and experimental powder X-ray diffraction patterns of  $\text{NaPO}_3\text{NH}_3$ . No obvious impurity peaks were found, confirming the phase purity.

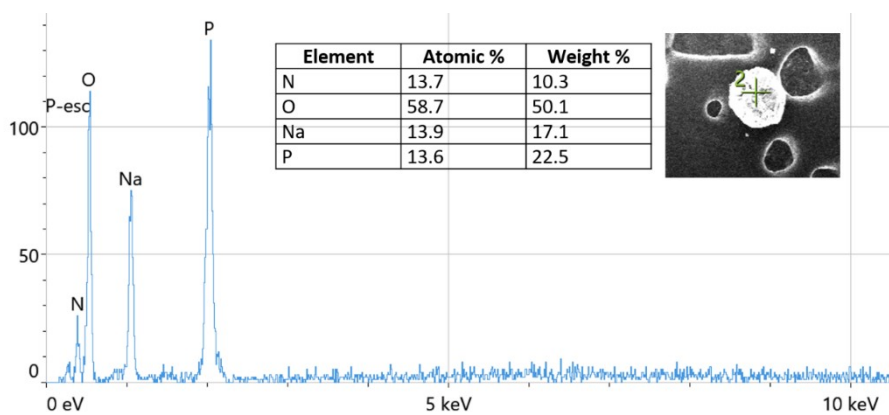

**Figure S2.** Energy dispersive X-ray spectroscopy analysis of  $\text{NaPO}_3\text{NH}_3$ .

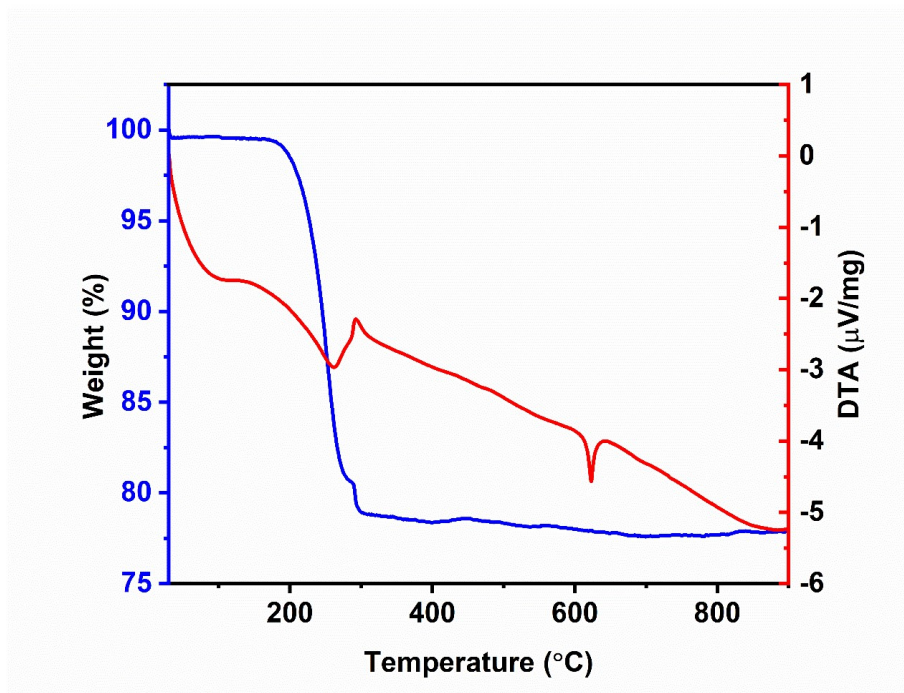

Figure S3. TG-DTA curves of  $\text{NaPO}_3\text{NH}_3$ .

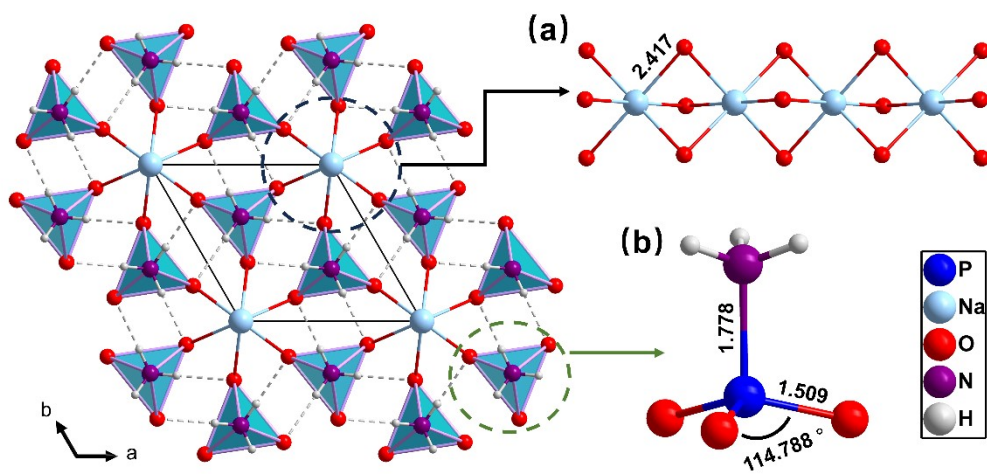

Figure S4. (a) Na-O chain; (b)  $[\text{PO}_3\text{NH}_3]^-$  group. (The unit of interatomic distance is Å)

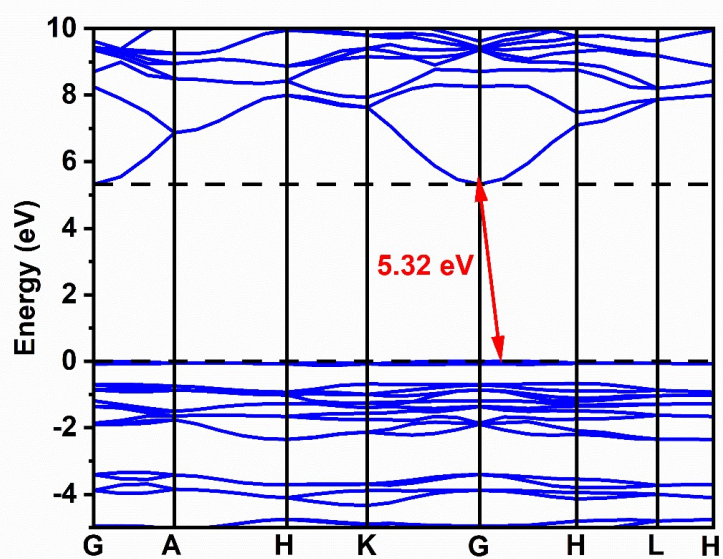

Figure S5. The calculated band structure of NaPO<sub>3</sub>NH<sub>3</sub>.

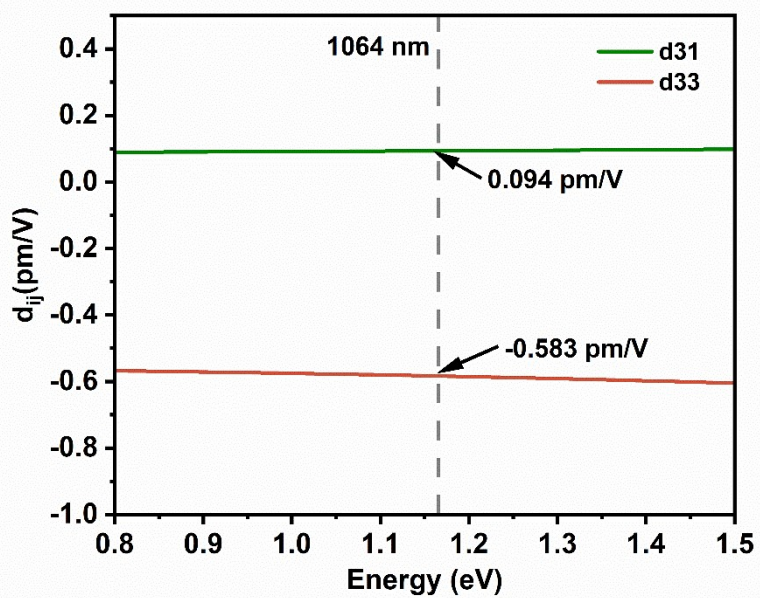

Figure S6. Calculated SHG coefficients of NaPO<sub>3</sub>NH<sub>3</sub>.



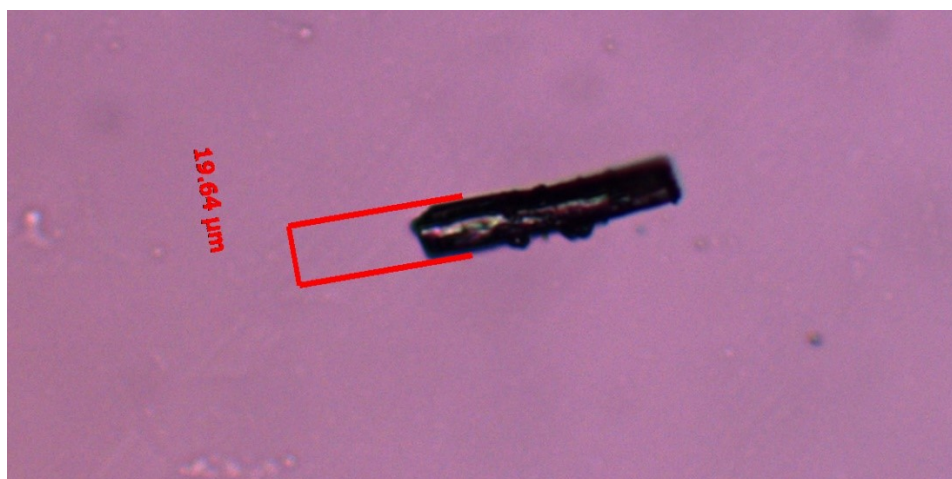

**Figure S7.** Single crystal of NPNH under the polarizing microscope. The measured thickness of NNPH is 19.64  $\mu\text{m}$ .

## References

- 1 S. G. Zhao, P. F. Gong, S. Y. Luo, L. Bai, Z. S. Lin, C. M. Ji, T. L. Chen, M. C. Hong and J. H. Luo. Deep-Ultraviolet Transparent Phosphates  $\text{RbBa}_7(\text{PO}_3)_5$  and  $\text{Rb}_7\text{Ba}_3(\text{P}_2\text{O}_7)_3$  Show Nonlinear Optical Activity from Condensation of  $[\text{PO}_4]^{3-}$  Units. *J. Am. Chem. Soc.*, 2014, **136**, 8560–8563.
- 2 P. Shan, T. O. Sun, H. D. Liu, S. G. Liu, S. L. Chen, X. W. Liu, Y. F. Kong and J. J. Xu. Growth, Properties, and Theoretical Analysis of  $\text{KBa}_2(\text{PO}_3)_5$  Single Crystal, *Cryst. Growth Des.*, 2016, **16**, 5588–5592.
- 3 M. Abudourehman, S. J. Han, B. H. Lei, Z. H. Yang, X. F. Long and S. L. Pan.  $\text{KPb}_7(\text{PO}_3)_5$ : a novel nonlinear optical lead polyphosphate with a short deep-UV cutoff edge, *J. Mater. Chem. C*, 2016, **4**, 10630–10637.
- 4 P. Shan, T. O. Sun, H. Chen, H. D. Liu, S. L. Chen, X. W. Liu, Y. F. Kong and J. J. Xu. Crystal growth and optical characteristics of beryllium-free polyphosphate,  $\text{KLa}(\text{PO}_3)_4$ , a possible deep-ultraviolet nonlinear optical crystal. *Sci Rep.* 2016, **6**, 25201.
- 5 T. O. Sun, P. Shan, H. Chen, X. W. Liu, H. D. Liu, S. L. Chen, Y. A. Cao, Y. F. Kong and J. J. Xu. Growth and properties of a noncentrosymmetric polyphosphate  $\text{CsLa}(\text{PO}_3)_4$  crystal with deep-ultraviolet transparency. *CrystEngComm*, 2014, **16**, 10497.
- 6 Y. G. Chen, M. L. Xing, P. F. Liu, Y. Guo, N. Yang and X. M. Zhang. Two Phosphates: Noncentrosymmetric  $\text{Cs}_6\text{Mg}_6(\text{PO}_3)_{18}$  and Centrosymmetric  $\text{Cs}_2\text{MgZn}_2(\text{P}_2\text{O}_7)_2$ , *Inorg. Chem.*, 2017, **56**, 845–851.
- 7 Z. Y. Bai, L. H. Liu, L. Z. Zhang, Y. S. Huang, F. F. Yuan and Z. B. Lin.  $\text{K}_7\text{SrP}_4\text{O}_{17}$ : a deep-UV transparent cyclophosphate as a nonlinear optical crystal. *Chem. Commun.*, 2019, **55**, 8454.
- 8 X. F. Lu, R. L. Wu, O. Jing, W. O. Chen, Y. J. Shi, X. Y. Dong, M. H. Lee and Z. H. Chen. Non-centrosymmetric  $\text{BaNaP}_3\text{O}_9$  with a short deep-ultraviolet cutoff edge, *Journal of Alloys and Compounds*, 2018, **764**, 170–176.
- 9 S. G. Zhao, Y. Yang, Y. G. Shen, X. D. Wang, O. R. Ding, X. F. Li, Y. O. Li, L. N. Li, Z. S. Lin and J. H. Luo. Beryllium-free deep-UV nonlinear optical material  $\text{CsNaMgP}_2\text{O}_7$  with honeycomb-like topological layers *J. Mater. Chem. C*, 2018, **15**.
- 10 S. G. Zhao, X. Y. Yang, Y. Yang, X. J. Kuang, F. O. Lu, P. Shan, Z. H. Sun, Z. S. Lin, M. C. Hong and J. H. Luo. Non-Centrosymmetric  $\text{RbNaMgP}_2\text{O}_7$  with Unprecedented Thermo-Induced Enhancement of Second Harmonic Generation. *J. Am. Chem. Soc.*, 2018, **140**, 5, 1592–1595.
- 11 J. Chen, L. Xiong, L. Chen and L. M. Wu.  $\text{Ba}_7\text{NaClP}_7\text{O}_7$ : Unprecedented Phase Matchability Induced by Symmetry Breaking and Its Unique Fresnoite-Type Structure, *J. Am. Chem. Soc.*, 2018, **140**, 14082–14086.
- 12 Y. G. Shen, S. G. Zhao, B. O. Zhao, C. M. Ji, L. N. Li, Z. H. Sun, M. C. Hong and J. H. Luo. Strong Nonlinear-Optical Response in the Pyrophosphate  $\text{CsLiCdP}_2\text{O}_7$  with a Short Cutoff Edge *Inorg. Chem.*, 2016, **55**, 11626–11629.
- 13 L. Li, S. J. Han, B. H. Lei, Y. Wang, H. Y. Li, Z. H. Yang and S. L. Pan. Three New Phosphates with Isolated  $\text{P}_2\text{O}_7$  Unit: Noncentrosymmetric  $\text{Cs}_2\text{Ba}_3(\text{P}_2\text{O}_7)_2$  and Centrosymmetric  $\text{Cs}_2\text{BaP}_2\text{O}_7$ ,  $\text{LiCsBaP}_2\text{O}_7$ , *Dalton Trans.*, 2016, **45**, 3936–3942.
- 14 H. W. Yu, J. S. Young, H. P. Wu, W. G. Zhang, J. M. Rondinelli and P. S. Halasvamani.  $\text{M}_4\text{Mg}_4(\text{P}_2\text{O}_7)_3$  ( $\text{M} = \text{K}, \text{Rb}$ ): Structural Engineering of Pyro-phosphates for NLO Applications, *Chem. Mater.*, 2017, **29**, 1845–1855.

- 15 P. Yu, L. M. Wu, L. J. Zhou and L. Chen. Deep-Ultraviolet Nonlinear Optical Crystals:  $\text{Ba}_3\text{P}_3\text{O}_{10}\text{X}$  (X = Cl, Br). *J. Am. Chem. Soc.*, 2014, **136**, 480–487.
- 16 S. G. Zhao, P. F. Gong, S. Y. Luo, L. Bai, Z. S. Lin, Y. Y. Tang, Y. L. Zhou, M. C. Hong, J. H. Luo, Tailored Synthesis of a Nonlinear Optical Phosphate with a Short Absorption Edge, *Angew. Chem.*, 2015, **127**, 4291–4295.
- 17 L. Li, Y. Wang, B. H. Lei, S. J. Han, Z. H. Yang, K. R. Poepelmeier and S. L. Pan. A New Deep-Ultraviolet Transparent Orthophosphate  $\text{LiCs}_2\text{PO}_4$  with Large Second Harmonic Generation Response, *J. Am. Chem. Soc.*, 2016, **138**, 9101–9104.
- 18 L. Li, Y. Wang, B. H. Lei, S. J. Han, Z. H. Yang, H. Y. Li and S. L. Pan.  $\text{LiRb}_7\text{PO}_4$ : a new deep-ultraviolet nonlinear optical phosphate with a large SHG response *J. Mater. Chem. C*, 2017, **5**, 269-274.
- 19 Z. Y. Bai, C. L. Hu, L. H. Liu, L. Z. Zhang, Y. S. Huang, F. F. Yuan and Z. B. Lin.  $\text{KMg}(\text{H}_2\text{O})\text{PO}_4$ : A Deep-Ultraviolet Transparent Nonlinear Optical Material Deriving from  $\text{KTiOPO}_4$ , *Chem. Mater.*, 2019, **31**, 9540–9545.
- 20 X. Zhang, L. R. Wang, S. F. Zhang, G. L. Wang, S. G. Zhao, Y. Zhu, Y. C. Wu and C. T. Chen. Optical properties of the vacuum-ultraviolet nonlinear optical crystal— $\text{BPO}_4$ , *J. Opt. Soc. Am. B*, 2011, **28**, 2236-2239.
- 21 B. B. Zhang, G. P. Han, Y. Wang, X. L. Chen, Z. H. Yang and S. L. Pan. Expanding Frontiers of Ultraviolet Nonlinear Optical Materials with Fluorophosphates. *Chem. Mater.*, 2018, **30**, 5397–5403.
- 22 J. Lu, J. N. Yue, L. Xiong, W. K. Zhang, L. Chen and L. M. Wu. Uniform alignment of non- $\pi$ -conjugated species enhances deep ultraviolet optical nonlinearity, *J. Am. Chem. Soc.*, 2019, **141**, 8093–8097.
- 23 L. Xiong, J. Chen, J. Lu, C. Y. Pan and L. M. Wu. Monofluorophosphates: A New Source of Deep-Ultraviolet Nonlinear Optical Materials. *Chem. Mater.*, 2018, **30**, 7823–7830.
- 24 O. R. Ding, X. Y. Zhang, Z.S. Lin, Z. Y. Xiong, Y. S. Wang, X. F. Long, S. G. Zhao, M. C. Hong, J. H. Luo, Designing a deep-UV nonlinear optical monofluorophosphate, *Sci. China: Chem.*, 2022, **65**, 1710-1714.
- 25 X. R. Yang, X. Liu, X. B. Deng, L. Chen and L. M. Wu. Isomeric  $\text{Cd}(\text{NH}_4)_6(\text{PO}_3\text{F})_6 \cdot 2\text{H}_2\text{O}$ : solution concentration-driven elimination of antiparallel dipole-dipole interaction generating an SHG  $\beta$  phase, *Materials Today Physics*, 2023, **31**, 100999.
- 26 C. Y. Pan, X. R. Yang, L. Xiong, Z. W. Lu, B. Y. Zhen, X. Sui, X. B. Deng, L. Chen, L. M. Wu, Solid-State Nonlinear Optical Switch with the Widest Switching Temperature Range Owing to Its Continuously Tunable  $T_c$ . *J. Am. Chem. Soc.*, 2020, **142**, 6423–6431.
- 27 X. R. Yang, X. Liu, Z. J. Wang, X. B. Deng, H. J. Lu, Y. J. Li, X. F. Long, L. Chen and L. M. Wu.  $\text{Na}_{1.5}\text{Rb}_{0.5}\text{PO}_3\text{F} \cdot \text{H}_2\text{O}$ : synthesis, properties, and stepwise reconstruction of the hydrogen bond network, *Inorg. Chem. Front.*, 2021, **8**, 4544.
